# Supplementary material for: Climate Change Mitigation in Agriculture: Barriers to the Adoption of Carbon Farming Policies in the EU
Source: MDPI journal article supplement (doi:10.3390/su151310452), 2023-07-03
Supplement: s1 [file s1]

**Table S4.** Interviews protocol.

| Section      | Questions                                                                                                                                                                                                                                                                                                                                                                                                                                                                                                                                                                               |
|--------------|-----------------------------------------------------------------------------------------------------------------------------------------------------------------------------------------------------------------------------------------------------------------------------------------------------------------------------------------------------------------------------------------------------------------------------------------------------------------------------------------------------------------------------------------------------------------------------------------|
| Introduction | <ul style="list-style-type: none"><li>– Brief outline of the research scope.</li><li>– Reminder that the interview is anonymous and confidential.</li><li>– Consent to record the interview.</li></ul>                                                                                                                                                                                                                                                                                                                                                                                  |
| General      | <ul style="list-style-type: none"><li>– Could you describe your work and the organisation you work for?</li><li>– How important do you think mitigation policies are in the agriculture sector?</li><li>– Do you think there is enough policy attention for mitigation in agriculture?</li><li>– What are the main barriers for policymakers to adopt carbon farming policies?</li><li>– Are there any institutional constraints on EU Member States to adopt carbon farming policies?</li><li>– Do EU Member States have enough incentives to adopt carbon farming policies?</li></ul> |
| Policymakers | <ul style="list-style-type: none"><li>– Which challenges have you experienced when adopting or developing policy x?</li></ul>                                                                                                                                                                                                                                                                                                                                                                                                                                                           |
| Conclusion   | <ul style="list-style-type: none"><li>– Is there anything you would like to add?</li></ul>                                                                                                                                                                                                                                                                                                                                                                                                                                                                                              |
