# Supplementary material for: Climate Change Mitigation in Agriculture: Barriers to the Adoption of Carbon Farming Policies in the EU
Source: MDPI journal article supplement (doi:10.3390/su151310452), 2023-07-03
Supplement: s1 [file s1]

**Table S1.** Carbon farming policies.

| Policy                                                                  | Year | Type      | Instrument                                          | Source |
|-------------------------------------------------------------------------|------|-----------|-----------------------------------------------------|--------|
| <b>European Union</b>                                                   |      |           |                                                     |        |
| Sustainable Carbon Cycles                                               | 2021 | Strategy  | Governance                                          | OECD   |
| EU Soil Strategy for 2030                                               | 2021 | Strategy  | Governance                                          | OECD   |
| EU Farm to Fork Strategy                                                | 2020 | Strategy  | Economic, governance, information                   | CCLW   |
| European Green Deal                                                     | 2019 | Strategy  | Governance                                          | OECD   |
| Effort Sharing Regulation                                               | 2018 | Law       | Governance                                          | CCLW   |
| Land Use, Land Use Change and Forestry (LULUCF) Regulation              | 2013 | Law       | Regulation                                          | CCLW   |
| Common Agricultural Policy                                              | 2013 | Law       | Direct investment, economic, governance, regulation | CCLW   |
| <b>Austria</b>                                                          |      |           |                                                     |        |
| Integrated National Energy and Climate Plan for Austria                 | 2019 | Plan      | Economic, governance, information                   | CCLW   |
| Long-Term Strategy 2050                                                 | 2019 | Strategy  | Governance                                          | UNFCCC |
| Austrian Climate and Energy Strategy #mission2030                       | 2018 | Strategy  | Governance                                          | NECP   |
| Austrian programme for environmentally friendly agriculture (ÖPUL)      | 2015 | Programme | Economic                                            | NECP   |
| <b>Belgium</b>                                                          |      |           |                                                     |        |
| Long-Term Strategy 2050                                                 | 2020 | Strategy  | Governance                                          | UNFCCC |
| National Energy and Climate Plan for Belgium                            | 2019 | Plan      | Economic, governance, information                   | CCLW   |
| <b>Bulgaria</b>                                                         |      |           |                                                     |        |
| Integrated National Energy and Climate Plan for Bulgaria                | 2019 | Plan      | Economic, governance, information                   | CCLW   |
| Agricultural Land Protection Act                                        | 2012 | Law       | Governance                                          | CCLW   |
| Agricultural Producers Support Act (ZPZP) 1998                          |      | Law       | Economic, governance                                | NECP   |
| <b>Croatia</b>                                                          |      |           |                                                     |        |
| Integrated National Energy and Climate Plan for the Republic of Croatia | 2019 | Plan      | Economic, governance, information, regulation       | CCLW   |

**Cyprus**

|                                                     |      |      |                                   |      |
|-----------------------------------------------------|------|------|-----------------------------------|------|
| Cyprus' Integrated National Energy and Climate Plan | 2020 | Plan | Economic, governance, information | CCLW |
|-----------------------------------------------------|------|------|-----------------------------------|------|

**Czechia**

|                                                        |      |          |                                   |        |
|--------------------------------------------------------|------|----------|-----------------------------------|--------|
| National Energy and Climate Plan of the Czech Republic | 2019 | Plan     | Economic, governance, information | CCLW   |
| Climate Protection Policy                              | 2017 | Strategy | Governance                        | UNFCCC |
| Government Decree No 48/2017                           | 2017 | Decree   | Economic, regulation              | NECP   |
| Government Decree 185/2015                             | 2015 | Decree   | Economic, regulation              | NECP   |

**Denmark**

|                                                                       |      |           |                                   |        |
|-----------------------------------------------------------------------|------|-----------|-----------------------------------|--------|
| Agreement on green conversion of Danish agriculture of 4 October 2021 | 2021 | Agreement | Economic, governance, information | OECD   |
| Climate Programme 2020                                                | 2020 | Programme | Governance                        | UNFCCC |
| Denmark's Integrated National Energy and Climate Plan                 | 2019 | Plan      | Economic, governance, information | CCLW   |
| Environment protection Act                                            | 2007 | Law       | Regulation                        | CCLW   |

**Estonia**

|                                                 |      |          |                                               |      |
|-------------------------------------------------|------|----------|-----------------------------------------------|------|
| Estonia's 2030 National Energy and Climate Plan | 2019 | Plan     | Economic, governance, information, regulation | CCLW |
| National Environmental Strategy until 2030      | 2007 | Strategy | Governance                                    | CPR  |

**Finland**

|                                                                      |      |           |                                               |        |
|----------------------------------------------------------------------|------|-----------|-----------------------------------------------|--------|
| Finland's long-term low greenhouse gas emission development strategy | 2020 | Strategy  | Governance                                    | UNFCCC |
| Finland's Integrated Energy and Climate Plan                         | 2019 | Plan      | Economic, governance, information, regulation | CCLW   |
| National Energy and Climate Strategy for 2030                        | 2016 | Strategy  | Economic, governance                          | CCLW   |
| Climate Programme for Finnish Agriculture                            | 2014 | Programme | Economic, governance, information             | NECP   |

**France**

|                                                      |      |      |                                               |      |
|------------------------------------------------------|------|------|-----------------------------------------------|------|
| Climate Action Plan Ministry of Agriculture and Food | 2021 | Plan | Governance, information                       | OECD |
| France's Integrated Energy and Climate Plan          | 2020 | Plan | Economic, governance, information, regulation | CCLW |

|                                                                                       |      |           |                                                                  |        |
|---------------------------------------------------------------------------------------|------|-----------|------------------------------------------------------------------|--------|
| France Relaunch Plan                                                                  | 2020 | Plan      | Direct investment, economic, governance, information             | CCLW   |
| Teaching to Produce Differently Plan                                                  | 2020 | Plan      | Information                                                      | NECP   |
| Organic Plan 2022                                                                     | 2018 | Plan      | Economic, governance, information                                | NECP   |
| Major Investment Plan 2018-2022                                                       | 2017 | Plan      | Direct investment, economic, information                         | NECP   |
| Climate Plan                                                                          | 2017 | Plan      | Economic, governance                                             | CCLW   |
| Agroforestry Development Plan                                                         | 2015 | Plan      | Governance                                                       | NECP   |
| National Low-Carbon Strategy (SNBC)                                                   | 2015 | Strategy  | Governance                                                       | CCLW   |
| Anaerobic Digestion and Nitrogen Autonomy Plan                                        | 2013 | Plan      | Governance                                                       | NECP   |
| Agri-Environmental Project for France                                                 | 2012 | Programme | Economic, governance, information                                | NECP   |
| <b>Germany</b>                                                                        |      |           |                                                                  |        |
| Integrated National Energy and Climate Plan                                           | 2019 | Plan      | Economic, governance, regulation                                 | CPR    |
| Future Strategy for Organic Farming                                                   | 2017 | Strategy  | Governance                                                       | NECP   |
| Climate Action Plan 2050                                                              | 2016 | Plan      | Direct investment, economic, governance, information, regulation | CCLW   |
| Federal program for organic farming and other forms of sustainable agriculture (BÖLN) | 2002 | Programme | Economic                                                         | NECP   |
| <b>Greece</b>                                                                         |      |           |                                                                  |        |
| Greece's National Energy and Climate Plan                                             | 2019 | Plan      | Economic, governance, regulation                                 | CCLW   |
| <b>Hungary</b>                                                                        |      |           |                                                                  |        |
| National Clean Development Strategy 2020- 2050                                        | 2021 | Strategy  | Governance                                                       | UNFCCC |
| Hungary's National Energy and Climate Plan                                            | 2019 | Plan      | Economic, governance                                             | CCLW   |
| National Energy Strategy 2030                                                         | 2012 | Strategy  | Governance                                                       | CCLW   |
| National Climate Change Strategy                                                      | 2008 | Strategy  | Governance                                                       | CPR    |

**Ireland**

|                                            |      |          |                                  |      |
|--------------------------------------------|------|----------|----------------------------------|------|
| Climate Action Plan                        | 2021 | Plan     | Economic, governance             | CPR  |
| Ag Climatise                               | 2020 | Strategy | Governance, information          | NECP |
| Ireland's National Energy and Climate Plan | 2020 | Plan     | Economic, governance, regulation | CCLW |
| National Development Plan 2018-2027        | 2018 | Plan     | Governance                       | CCLW |

**Italy**

|                                                                                              |      |        |                        |      |
|----------------------------------------------------------------------------------------------|------|--------|------------------------|------|
| Italy's Integrated National and Energy Climate Plan                                          | 2019 | Plan   | Governance, regulation | CCLW |
| Ministerial Decree of March 2, 2018, promoting the use of biomethane in the transport sector | 2018 | Decree | Governance             | CCLW |

**Latvia**

|                                                         |      |          |                         |      |
|---------------------------------------------------------|------|----------|-------------------------|------|
| Latvia's National Energy and Climate Plan 2021-2030     | 2020 | Plan     | Governance, regulation  | CCLW |
| Latvia's Strategy to achieve climate neutrality by 2050 | 2019 | Strategy | Governance, information | CCLW |

**Lithuania**

|                                                                             |      |          |                                   |        |
|-----------------------------------------------------------------------------|------|----------|-----------------------------------|--------|
| Lithuanian Climate Change Management Agenda 2021                            | 2021 | Strategy | Governance, information           | UNFCCC |
| National Energy and Climate Plan of the Republic of Lithuania for 2021-2030 | 2019 | Plan     | Economic, governance, information | CCLW   |

**Luxembourg**

|                                                                        |      |          |                                   |        |
|------------------------------------------------------------------------|------|----------|-----------------------------------|--------|
| Long Term Climate Strategy 2050                                        | 2021 | Strategy | Governance                        | UNFCCC |
| Luxembourg's integrated National Energy and Climate Plan for 2021-2030 | 2019 | Plan     | Economic, governance, information | CCLW   |

**Malta**

|                                                                                                           |      |          |                                   |        |
|-----------------------------------------------------------------------------------------------------------|------|----------|-----------------------------------|--------|
| Malta Low Carbon Development Strategy                                                                     | 2021 | Strategy | Governance, information           | UNFCCC |
| Malta's 2030 National Energy and Climate Plan                                                             | 2019 | Plan     | Economic, governance, information | CCLW   |
| National Strategy for Policy and Abatement Measures Relating to the Reduction of Greenhouse Gas Emissions | 2009 | Strategy | Governance                        | CCLW   |

### **The Netherlands**

|                                                       |      |           |                                   |      |
|-------------------------------------------------------|------|-----------|-----------------------------------|------|
| Integrated National Energy and Climate Plan 2021-2030 | 2019 | Plan      | Economic, governance, regulation  | CCLW |
| Long term strategy on climate mitigation              | 2019 | Strategy  | Governance                        | CCLW |
| National Climate Agreement                            | 2019 | Agreement | Economic, governance, information | CCLW |
| National regulation on subsidies                      | 2014 | Decree    | Economic, governance              | CCLW |
| Climate Agenda: resilient, prosperous and green       | 2013 | Strategy  | Governance                        | CPR  |

### **Poland**

|                                                                                                                                               |      |      |                               |      |
|-----------------------------------------------------------------------------------------------------------------------------------------------|------|------|-------------------------------|------|
| Poland's National Energy and Climate Plan for 2021-2030                                                                                       | 2019 | Plan | Governance, information       | CCLW |
| Act on Renewable Energy Sources                                                                                                               | 2015 | Law  | Direct investment, governance | CCLW |
| Regulation of the Council of Ministers on types of programmes and projects to be implemented under the National Green Investment Scheme (GIS) | 2009 | Law  | Governance, information       | CCLW |
| Act on the System to Manage the Emissions of Greenhouse Gases and Other Substances                                                            | 2009 | Law  | Governance, information       | CPR  |

### **Portugal**

|                                                                                                                                             |      |          |                                   |      |
|---------------------------------------------------------------------------------------------------------------------------------------------|------|----------|-----------------------------------|------|
| Portugal's National Energy and Climate Plan for 2021-2030                                                                                   | 2019 | Plan     | Economic, governance, information | CCLW |
| Resolution no 107/2019 of the Council of Ministers approving the Long-Term Strategy for Carbon Neutrality of the Portuguese Economy in 2050 | 2019 | Strategy | Economic, governance, information | CCLW |

### **Romania**

|                                                                 |      |      |                                   |      |
|-----------------------------------------------------------------|------|------|-----------------------------------|------|
| Romania's 2021-2030 Integrated National Energy and Climate Plan | 2020 | Plan | Economic, governance, information | CCLW |
|-----------------------------------------------------------------|------|------|-----------------------------------|------|

### **Slovakia**

|                                                                                       |      |          |                                   |        |
|---------------------------------------------------------------------------------------|------|----------|-----------------------------------|--------|
| Low-Carbon Development Strategy of the Slovak Republic until 2030 with a View to 2050 | 2020 | Strategy | Governance                        | UNFCCC |
| Slovakia's Integrated National Energy and Climate Plan for 2021 to 2030               | 2019 | Plan     | Economic, governance, information | CCLW   |
| Slovak Government Regulation No 342/2014, laying down rules for granting              | 2014 | Law      | Economic, regulation              | NECP   |

support in agriculture in the context of  
decoupled direct payment schemes

|                                                                                                                                                          |      |        |            |      |
|----------------------------------------------------------------------------------------------------------------------------------------------------------|------|--------|------------|------|
| Establishment of sustainability criteria and targets to reduce greenhouse gas emissions from fuels, Decree of Ministry of Environment No. 271/2011 Coll. | 2011 | Decree | Regulation | CCLW |
|----------------------------------------------------------------------------------------------------------------------------------------------------------|------|--------|------------|------|

## Slovenia

|                                                                     |      |          |                                   |        |
|---------------------------------------------------------------------|------|----------|-----------------------------------|--------|
| Resolution 'Our food, rural areas and natural resources after 2021' | 2021 | Strategy | Governance                        | NECP   |
| Slovenia's Long-Term Climate Strategy until 2050                    | 2021 | Strategy | Governance                        | UNFCCC |
| Slovenia's integrated National Energy and Climate Plan              | 2020 | Plan     | Economic, governance, information | CCLW   |

## Spain

|                                                                   |      |           |                                   |        |
|-------------------------------------------------------------------|------|-----------|-----------------------------------|--------|
| Long Term Decarbonisation Strategy 2050                           | 2020 | Strategy  | Governance                        | UNFCCC |
| Spain's integrated National Energy and Climate Plan for 2021-2030 | 2020 | Plan      | Economic, governance, information | CCLW   |
| National program for the promotion of crop rotations in dry land  | 2010 | Programme | Economic, governance              | NECP   |
| Spanish Forest Plan                                               | 2002 | Plan      | Governance                        | CCLW   |

## Sweden

|                                                      |      |          |                                   |      |
|------------------------------------------------------|------|----------|-----------------------------------|------|
| Sweden's Integrated National Energy and Climate Plan | 2020 | Strategy | Economic, governance, information | CCLW |
|------------------------------------------------------|------|----------|-----------------------------------|------|

---

## Typology of instruments

The list below offers an overview of the instrument types used for the desk research. This typology was drawn from the methodology of the CCLW database [1], which is itself based on Hood and Margetts' NATO typology [2].

### Direct Investment:

- Provision of climate funds;
- Nature-based solutions and ecosystem restoration;
- Provision of climate finance;
- Green procurement;
- Early warning systems;
- Other.

### Economic:

- Subsidies;
- Tax incentives;
- Carbon pricing and emissions trading;
- Insurance;
- Climate finance tools;
- Other.

### Governance:

- Capacity building;
- Institutional mandates;
- Planning;
- Processes, plans, and strategies;
- MRV;
- Subnational and citizen participation;
- International cooperation;
- Other.

### Information:

- Education, training, and knowledge dissemination;
- Research and Development, and knowledge generation.

### Regulation:

- Standards, obligations, and norms;
- Disclosure obligations;
- Moratoria and bans;
- Zoning and spatial planning;
- Other.

1. Grantham Research Institute on Climate Change and the Environment; Sabin Center for Climate Change Law. Climate Change Laws of the World Database. Available online: <https://climate-laws.org> (accessed on 5 August 2022).
2. Hood, C.; Margetts, H. *The Tools of Government in the Digital Age*; Bloomsbury Publishing Plc: London, UK, 2007; ISBN 978-1-137-06154-6.
