# Supplementary material for: Climate Change Mitigation in Agriculture: Barriers to the Adoption of Carbon Farming Policies in the EU
Source: MDPI journal article supplement (doi:10.3390/su151310452), 2023-07-03
Supplement: s1 [file s1]

**Table S3.** List of interviewees.

| Code | Stakeholder          | Description                                               |
|------|----------------------|-----------------------------------------------------------|
| EU1  | EU policymaker       | European Commission, DG Climate Action                    |
| EU2  | EU policymaker       | European Commission, DG Climate Action                    |
| EU3  | EU policymaker       | European Commission, DG Climate Action                    |
| FR1  | French policymaker   | Ministry of Agriculture and Food Sovereignty              |
| IE1  | Irish policymaker *  | Department of the Environment, Climate and Communications |
| IE2  | Irish policymaker *  | Department of the Environment, Climate and Communications |
| IE3  | Irish policymaker ** | Department of Agriculture, Food and the Marine            |
| IE4  | Irish policymaker ** | Department of Agriculture, Food and the Marine            |
| RE1  | Research             | Think tank                                                |
| RE2  | Research             | University professor                                      |
| RE3  | Research             | Agriculture research institute                            |
| RE4  | Research             | Non-profit organisation                                   |
| FA1  | Farmers association  | French farmers association                                |
| ME1  | Media                | Journalist                                                |

\* joint interview. \*\* joint interview.
