# Supplementary material for: Climate Change Mitigation in Agriculture: Barriers to the Adoption of Carbon Farming Policies in the EU
Source: MDPI journal article supplement (doi:10.3390/su151310452), 2023-07-03
Supplement: s1 [file s1]

Archive with 5 entries (5 files):
- sustainability-2313486-supplementary/Figure S1 interviews thematic map.pdf
- sustainability-2313486-supplementary/Table S1 carbon farming policies.pdf
- sustainability-2313486-supplementary/Table S2 carbon farming targets.pdf
- sustainability-2313486-supplementary/Table S3 list of interviewees.pdf
- sustainability-2313486-supplementary/Table S4 interviews protocol.pdf
