# Supplementary material for: Climate Change Mitigation in Agriculture: Barriers to the Adoption of Carbon Farming Policies in the EU
Source: MDPI journal article supplement (doi:10.3390/su151310452), 2023-07-03
Supplement: s1 [file s1 › sustainability-2313486-supplementary/Table S2 carbon farming targets.pdf]

**Table S2.** Carbon farming targets.

| Country         | Target                                                                                                                         | Policy                                                                                                    | Year | Scope                                   | Target type        | Target year | Base year | Source |
|-----------------|--------------------------------------------------------------------------------------------------------------------------------|-----------------------------------------------------------------------------------------------------------|------|-----------------------------------------|--------------------|-------------|-----------|--------|
| Denmark         | 55-65% reduction in GHG emissions from agriculture and forestry by 2030 compared to 1990 levels                                | Agreement on green conversion of Danish agriculture of 4 October 2021                                     | 2021 | Agriculture and forestry                | Base year target   | 2030        | 1990      | OECD   |
| France          | 72 Mt CO <sub>2</sub> eq carbon budget for agriculture and forestry (excl. LULUCF) in 2029-2033                                | National Low-Carbon Strategy                                                                              | 2020 | Agriculture and forestry (excl. LULUCF) | Carbon budget      | 2029-2033   | n/a       | NECP   |
| Germany         | 56 Mt CO <sub>2</sub> eq permissible annual emission budget for agriculture in 2030                                            | Federal Climate Protection Act                                                                            | 2019 | Agriculture                             | Carbon budget      | 2030        | n/a       | CCLW   |
| Ireland         | 25% emission reduction for agriculture by 2030 (17.25 MtCO <sub>2</sub> eq), compared to 2018 levels (23 MtCO <sub>2</sub> eq) | Climate Action Plan                                                                                       | 2022 | Agriculture                             | Base year target   | 2030        | 2018      | OECD   |
| Lithuania       | 11% GHG emissions reductions in agriculture by 2030, compared to 2005                                                          | Lithuanian Climate Change Management Agenda 2021                                                          | 2021 | Agriculture                             | Base year target   | 2030        | 2005      | UNFCCC |
| Malta           | 50% reduction of nitrogen in manure                                                                                            | National Strategy for Policy and Abatement Measures Relating to the Reduction of Greenhouse Gas Emissions | 2009 | Nitrogen in manure                      | Base year target   | /           | /         | CCLW   |
| The Netherlands | 3.5 Mt GHG emissions reduction in agriculture and land use sectors by 2030                                                     | National Climate Agreement                                                                                | 2019 | Agriculture and land use                | Fixed level target | 2030        | n/a       | CCLW   |
| Portugal        | 11% reductions of CO <sub>2</sub> eq emissions from agriculture by 2030 compared to 2005                                       | NECP                                                                                                      | 2019 | Agriculture                             | Base year target   | 2030        | 2005      | CCLW   |
| Slovakia        | 13.5% of total agricultural land occupied by organic farming by 2030                                                           | Greener Slovakia - Strategy of the Environmental Policy of the Slovak Republic until 2030                 | 2019 | Organic farming                         | Fixed level target | 2030        | n/a       | CCLW   |

|                |                                                                                                                                    |                                                       |      |                 |                    |      |      |        |
|----------------|------------------------------------------------------------------------------------------------------------------------------------|-------------------------------------------------------|------|-----------------|--------------------|------|------|--------|
| Slovenia       | 1% GHG emissions reduction in agriculture by 2030 compared to 2005                                                                 | NECP                                                  | 2020 | Agriculture     | Base year target   | 2030 | 2005 | NECP   |
| Slovenia       | 22% emissions reduction by 2050 in agriculture, compared to 2005, with intermediate targets of 1% reduction by 2030 and 8% by 2040 | Slovenia's Long-Term Climate Strategy until 2050      | 2021 | Agriculture     | Base year target   | 2050 | 2005 | UNFCCC |
| European Union | reduce the use of pesticides by 50% by 2030                                                                                        | Farm to Fork Strategy                                 | 2020 | Pesticides      | Base year target   | 2030 | /    | CCLW   |
| European Union | 25% organic farming by 2030                                                                                                        | Action Plan for the development of organic production | 2021 | Organic farming | Fixed level target | 2030 | n/a  | CCLW   |

---
