# Supplementary figures and images for: Climate Change Mitigation in Agriculture: Barriers to the Adoption of Carbon Farming Policies in the EU
Source: MDPI journal article supplement (doi:10.3390/su151310452), 2023-07-03

**Figure S1.** Interviews thematic map.

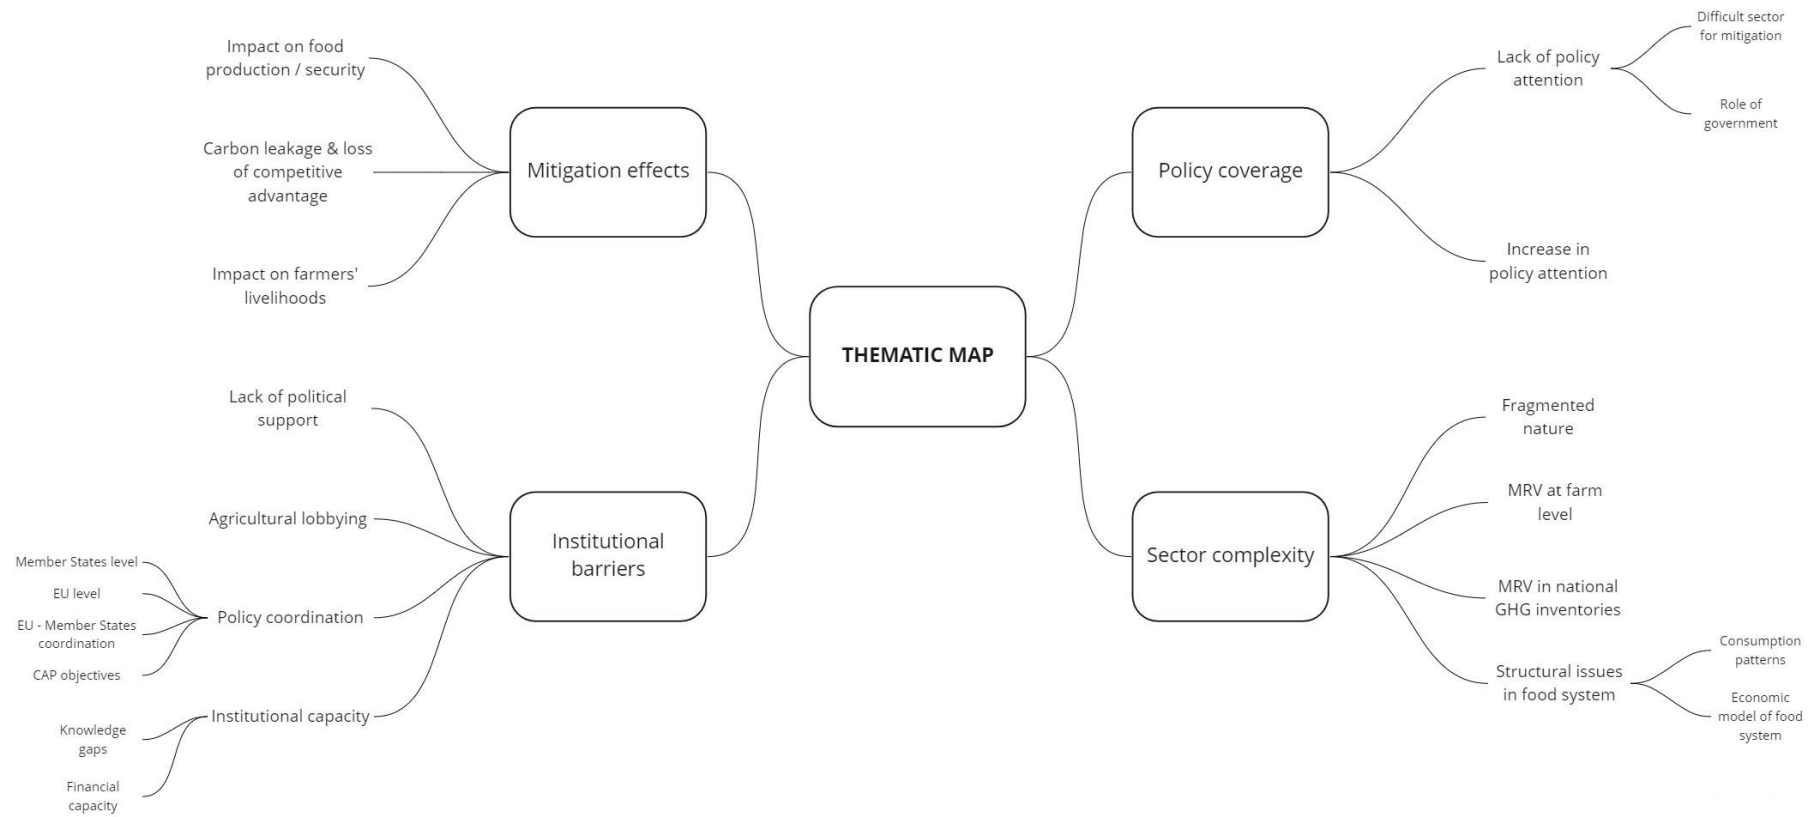

Supplement: s1 [file s1]
